# Supplementary material for: Mice Heterozygous for Tumor Necrosis Factor-α Converting Enzyme Are Protected From Obesity-Induced Insulin Resistance and Diabetes
Source: Oxford University Press journal article supplement (doi:10.2337/db07-0360), 2007-09-05
Supplement: db070360supplementalmethods.doc [file db070360supplementalmethods.doc]

Supplemental methods

*Levels of phosphotyrosine proteins.* Totallysates from WAT, liver and muscle were subjected to immunoprecipitation (1 mg/sample) and immunoblot analysis with anti-phosphotyrosine antibody (PY-20, Santa Cruz) as previously described (9). Membranes were stripped and reblotted with anti-Insr and anti-IRS-1 antibodies (Santa Cruz) to identify insulin signaling proteins.

Supplemental Figure 1 legend

*Levels of phosphotyrosine proteins.*Immunoprecipatated phosphotyrosine proteins from WAT (a), Muscle (b) and Liver (c) of WT HFD and Tace+/- HFD mice. Membranes were stripped and reblotted with anti-Insrβ and anti-IRS-1 antibodies to identify bands corresponding to insulin signaling proteins in phosphotyrosine immunoblots (d,). Tace+/- HFD showed increased phosphotyrosine proteins compared to WT HFD mice (**p<0.01 for WT HFD vs Tace+/- HFD, Anova-1, n=3 per group). Data are mean±SD.
